# Supplementary material for: Effect of architecture on the thermo-induced phase transition of methacrylate-based symmetric pentablock terpolymers
Source: Royal Society of Chemistry journal article supplement (doi:10.1039/d4py01033g), 2024-01-01
Supplement: d4py01033g1.pdf [file d4py01033g1.pdf]

# Supplementary Information

## Effect of Architecture on the Thermo-induced Phase Transition of Methacrylate-based Symmetric Pentablock Terpolymers

*Shaobai Wang, Xu Liu, Shuchen Wang, Theoni K. Georgiou \**

*Department of Materials, Royal School of Mines, Imperial College London, London SW7 2AZ, United Kingdom*

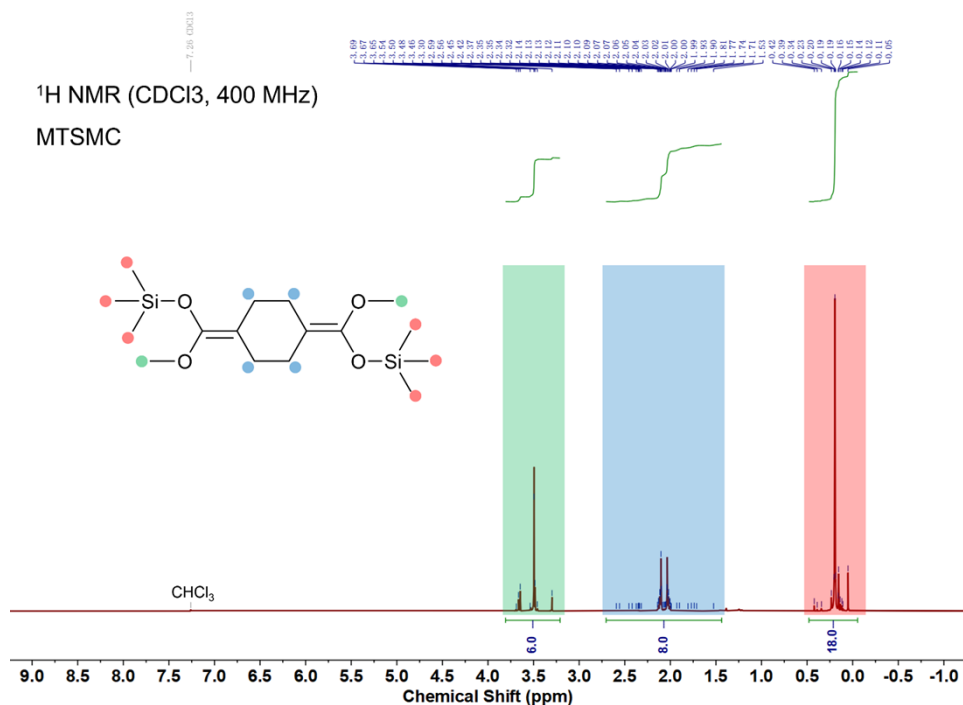

**Figure S1.** <sup>1</sup>H NMR spectrum of the obtained bifunctional initiator MTSMC (*Cis/trans* isomerism has been omitted). The spectrum was collected in CDCl<sub>3</sub> solution (TMS-free) at 25 °C with a scanning time of 16.

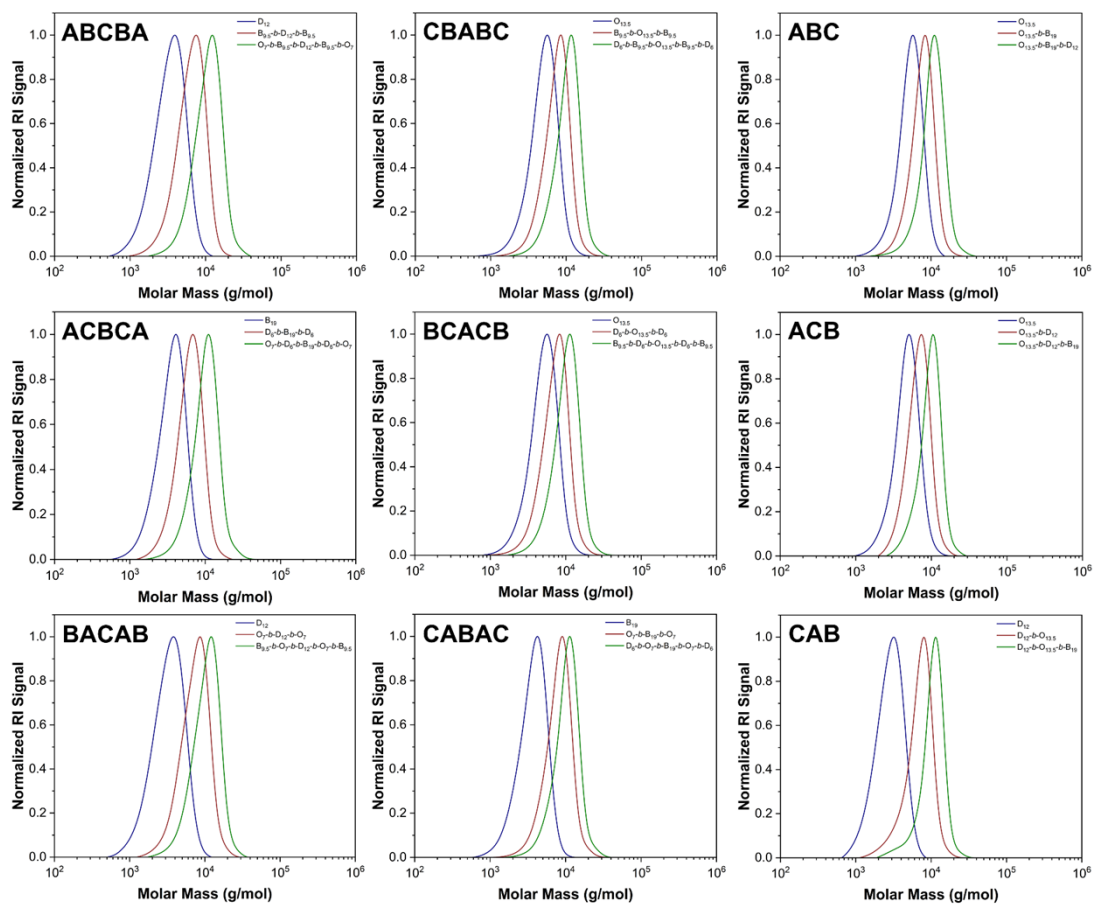

**Figure S2.** GPC traces of the obtained terpolymers with the respective precursors in THF-Et<sub>3</sub>N (95-5 vol%) mixture.

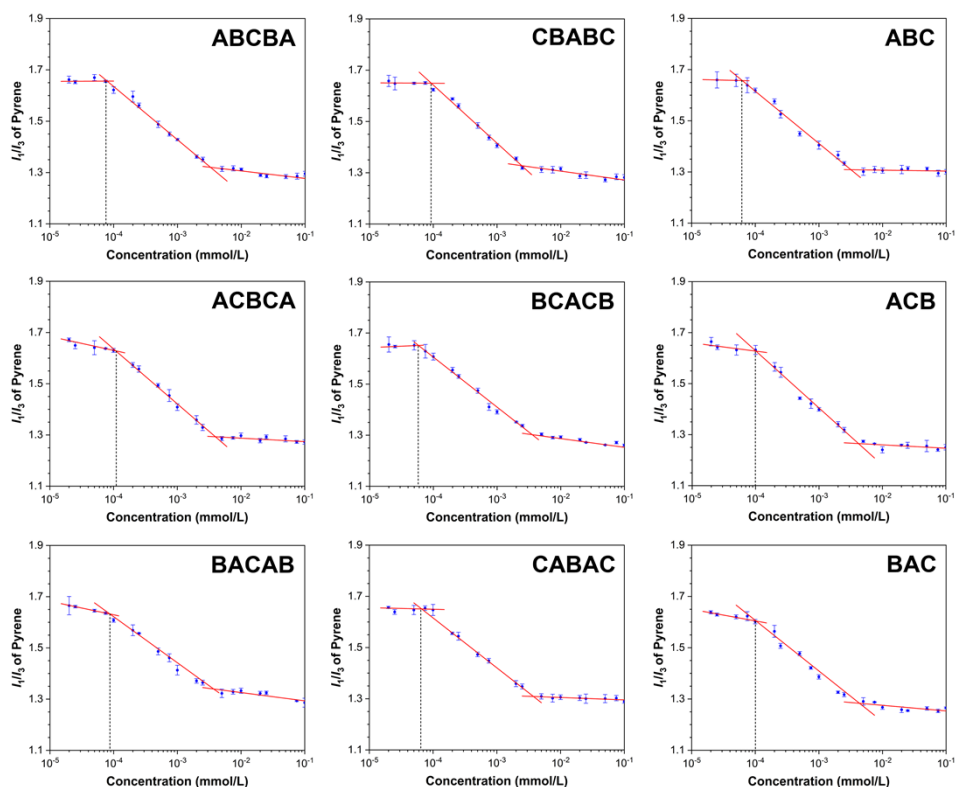

**Figure S3.**  $I_1/I_3$  of pyrene-concentration relationships of the terpolymers in DI water at 25 °C. The excitation wavelength was 334 nm.

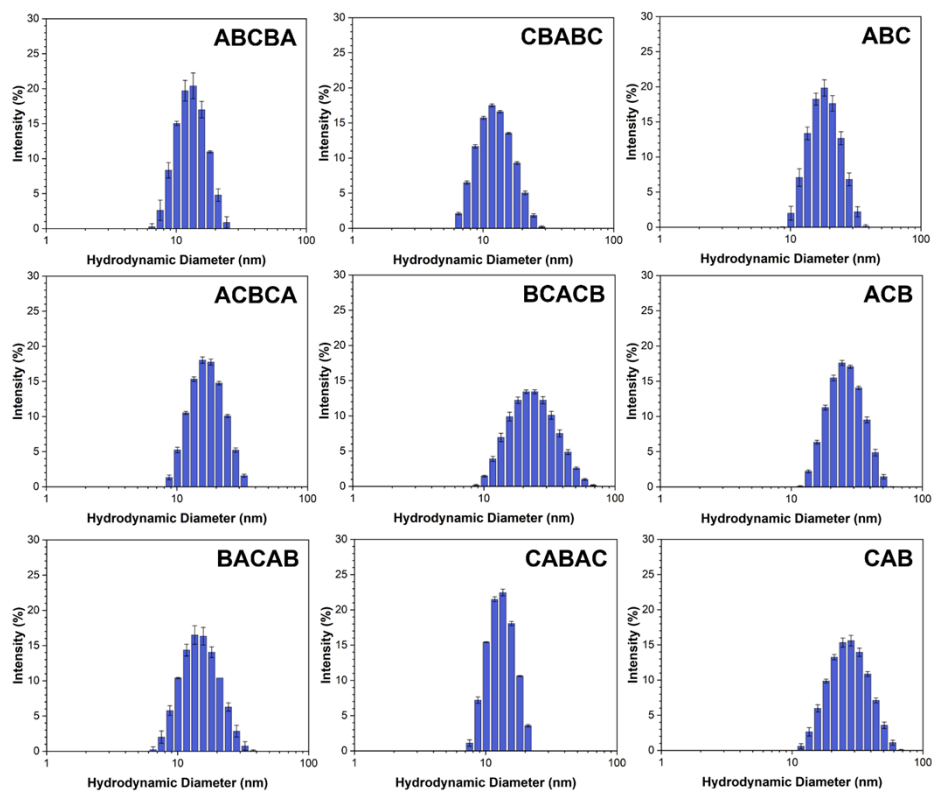

**Figure S4.** DLS histograms of the overall intensity-based  $d_h$  distribution of the 1 wt% H<sub>2</sub>O solution of the terpolymers at 25 °C.

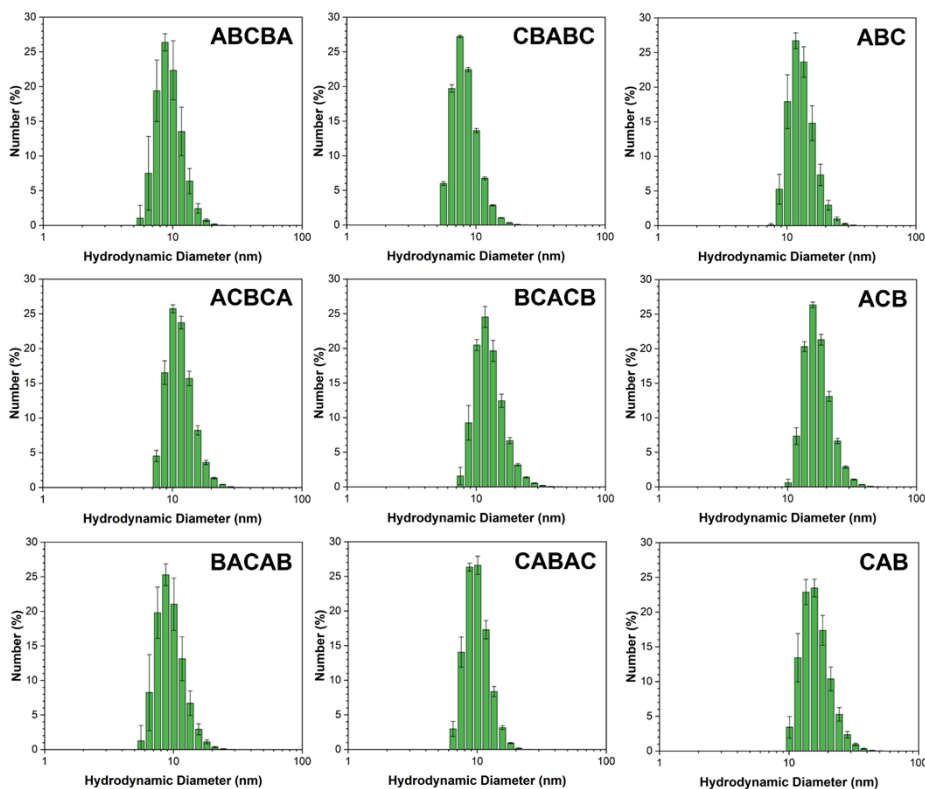

**Figure S5.** DLS histograms of the overall number-based  $d_h$  distribution of the 1 wt% H<sub>2</sub>O solution of the terpolymers at 25 °C.

| Group | Triblocks                                                    | Pentablocks                                                    |                                                                |
|-------|--------------------------------------------------------------|----------------------------------------------------------------|----------------------------------------------------------------|
| I     | ABC<br>200 nm<br>Size by TEM: 14 ± 2 nm<br>by DLS: 13 ± 3 nm | ABCBA<br>200 nm<br>Size by TEM: 12 ± 2 nm<br>by DLS: 10 ± 3 nm | CBABC<br>200 nm<br>Size by TEM: 15 ± 2 nm<br>by DLS: 8 ± 2 nm  |
| II    | ACB<br>200 nm<br>Size by TEM: 16 ± 3 nm<br>by DLS: 17 ± 4 nm | ACBCA<br>200 nm<br>Size by TEM: 13 ± 3 nm<br>by DLS: 12 ± 3 nm | BCACB<br>200 nm<br>Size by TEM: 14 ± 2 nm<br>by DLS: 13 ± 4 nm |
| III   | CAB<br>200 nm<br>Size by TEM: 15 ± 4 nm<br>by DLS: 17 ± 5 nm | CABAC<br>200 nm<br>Size by TEM: 13 ± 2 nm<br>by DLS: 10 ± 2 nm | BACAB<br>200 nm<br>Size by TEM: 12 ± 2 nm<br>by DLS: 10 ± 3 nm |

**Figure S6.** Representative TEM micrographs of the polymeric micelles at 1 wt% in DI water at 25 °C. Samples were negatively stained by 2 wt% uranyl acetate before observation. “Size by DLS” here is the number-averaged  $d_h$ .

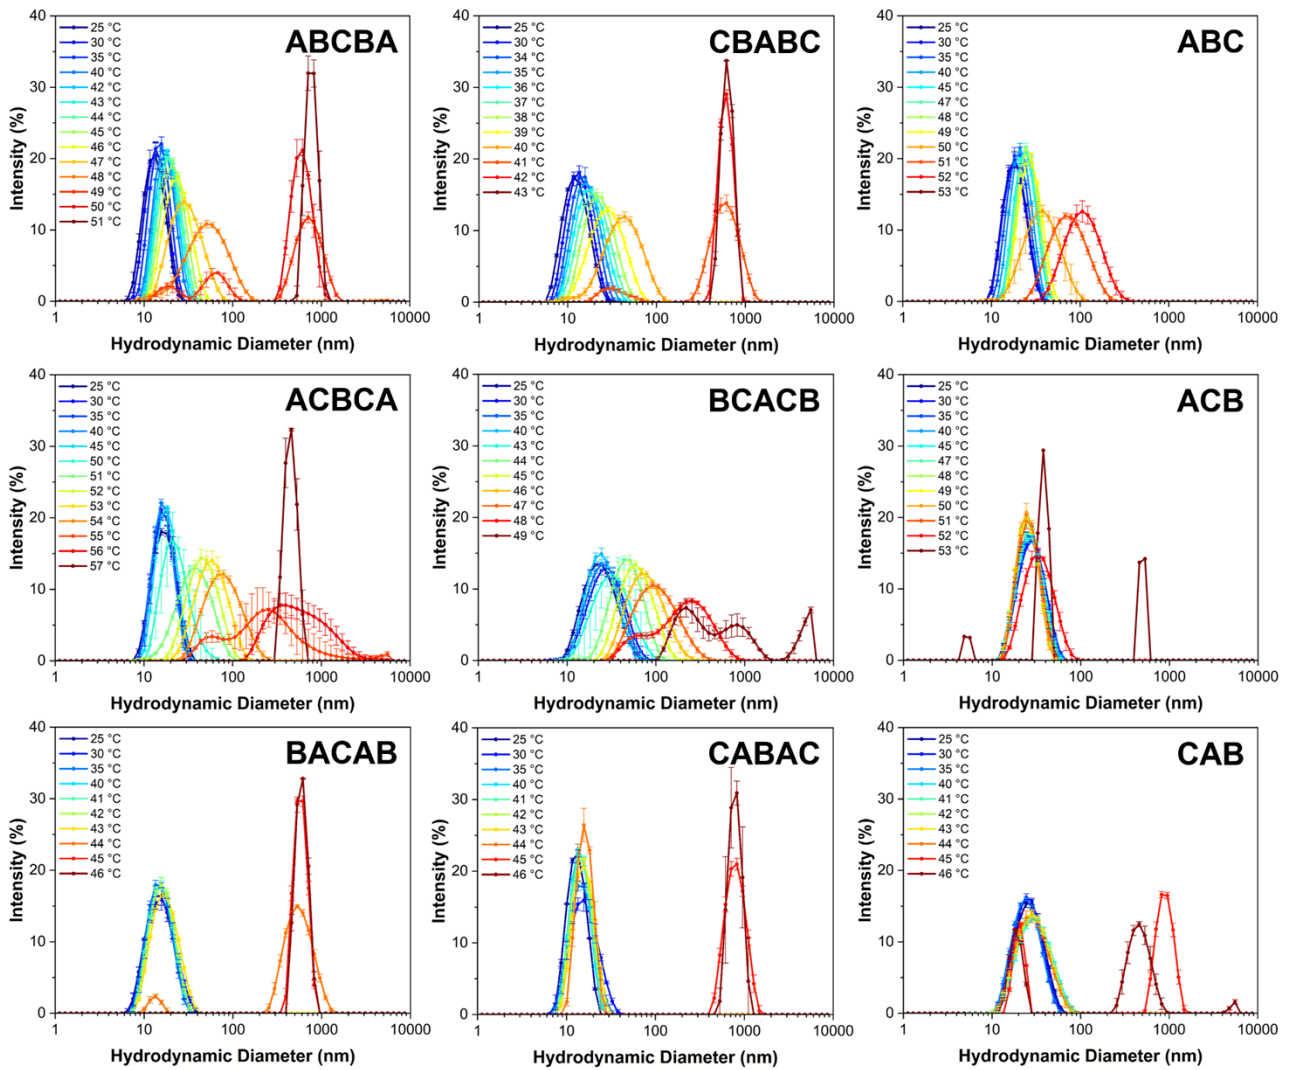

**Figure S7.** The DLS curves of overall intensity-averaged  $d_h$  distributions of the terpolymers in 1 wt% H<sub>2</sub>O solution in various temperatures.

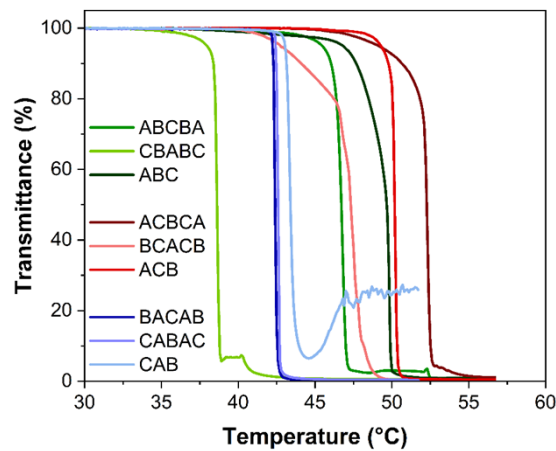

**Figure S8.** Transmittance-temperature dependence of the terpolymers in 1 wt% D<sub>2</sub>O solution.

**Table S1.**  $T_{cp}$  of the terpolymers in 1 wt% D<sub>2</sub>O solution.

| Group | Architecture | $T_{cp}$ ( $\pm 1$ °C) |
|-------|--------------|------------------------|
| I     | ABCBA        | 47                     |
|       | CBABC        | 39                     |
|       | ABC          | 50                     |
| II    | ACBCA        | 52                     |
|       | BCACB        | 47                     |
|       | ACB          | 50                     |
| III   | BACAB        | 42                     |
|       | CABAC        | 43                     |
|       | CAB          | 43                     |

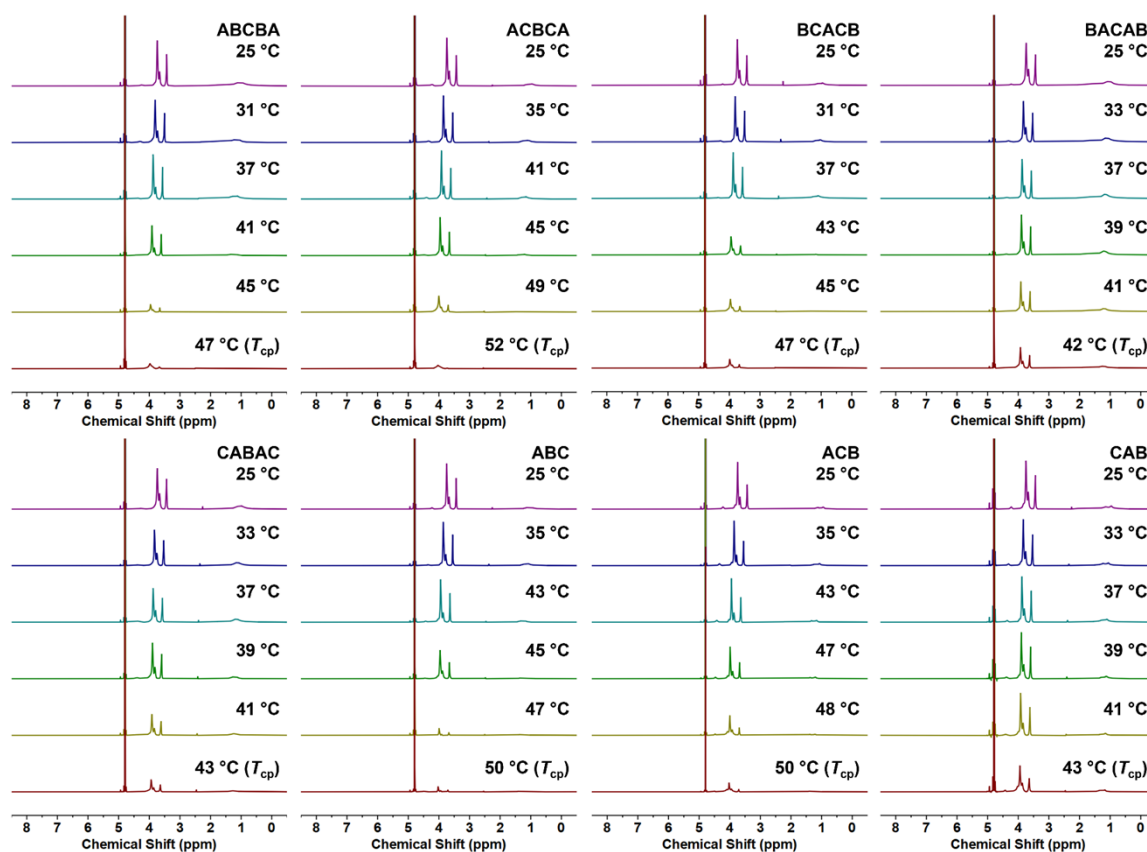

**Figure S9.** VT-<sup>1</sup>H NMR of the terpolymers at 1 wt% in D<sub>2</sub>O, collected with 16 scans and a relaxation time of 10 seconds. Top row from left to right: ABCBA, ACBCA, BCACB, and BACAB; bottom row from left to right: CABAC, ABC, ACB, and CAB.

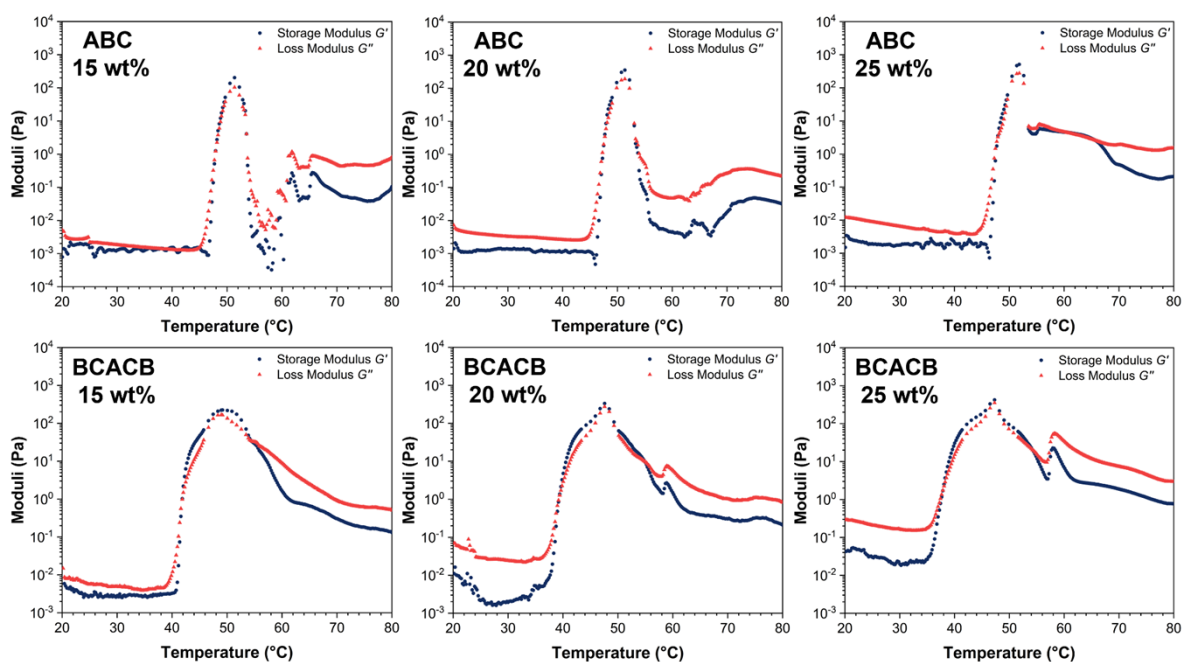

**Figure S10.** Typical temperature-moduli relationship of ABC and BCACB at gellable concentrations in PBS, obtained under an angular frequency of 1.0 rad/s, a strain of 1.0%, and a heating rate of 1 °C/min.

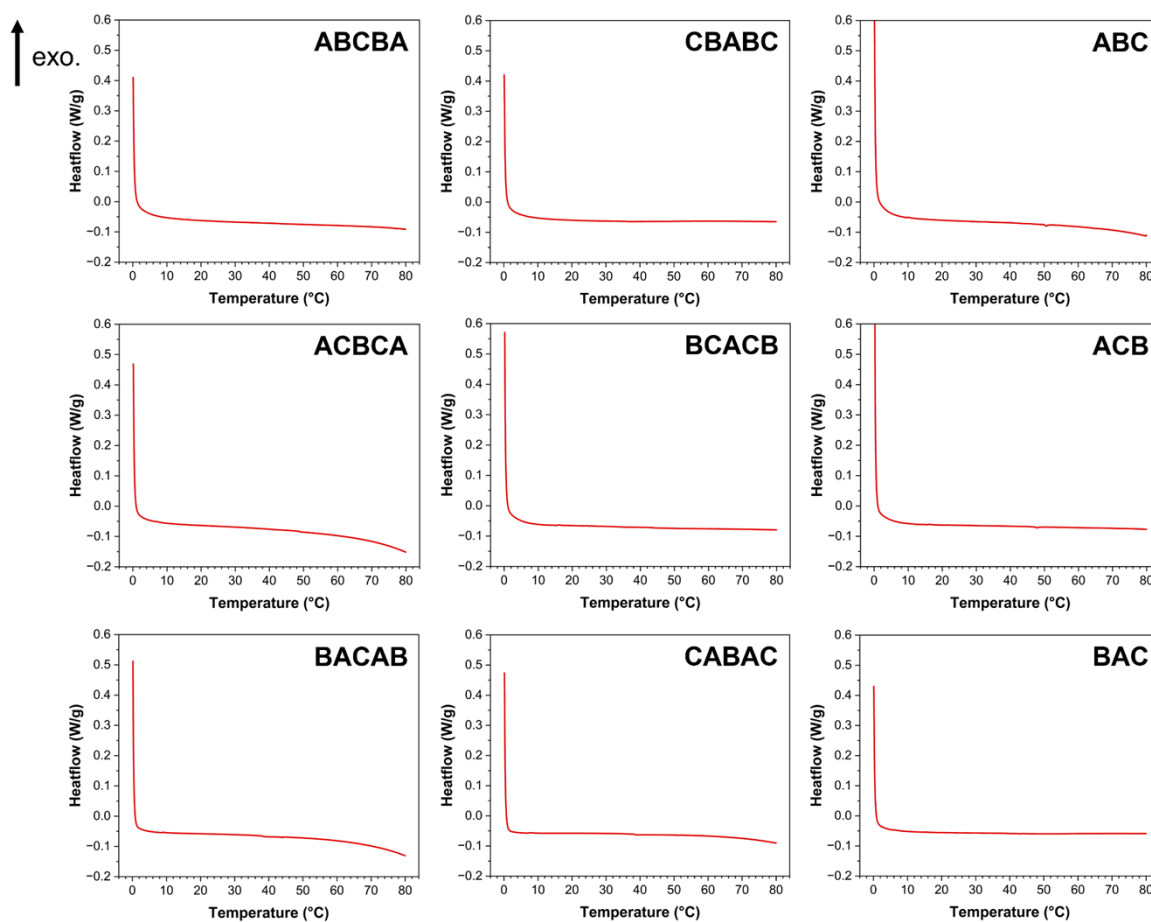

**Figure S11.** DSC thermograms of the polymer solutions at 25 wt% in PBS (pH = 7.4, 1 $\times$ ). The characterisations were performed under constant nitrogen flow (10 mL/min) and the heating rate was 1.0 °C/min.
